# Supplementary material for: Full-Dimensional Ab Initio Potential Energy Surface and Vibrational Energy Levels of Li2H
Source: MDPI journal article supplement (doi:10.3390/molecules24010026), 2018-12-21
Supplement: s1 [file s1]

Supplemental Material

# Vibrational Configuration Interaction Calculations For Li<sub>2</sub>H From Full-Dimensional *Ab Initio* Potential Energy Surfaces

Michiko Ahn Furudate <sup>1</sup>, Denis Hagebaum-Reignier <sup>2,\*</sup> and Gwang-Hi Jeung <sup>2</sup>

<sup>1</sup> Department of Mechatronics Engineering, Chungnam National University, Daejeon 34134, South Korea; furu@cnu.ac.kr

<sup>2</sup> Aix Marseille Univ, CNRS, Centrale Marseille, iSm2, Marseille, France; gwang-hi.jeung@univ-amu.fr

\* Correspondence: denis.hagebaum-reignier@univ-amu.fr; Tel.: +33-491-288-918

Received: 21 November 2018; Accepted: 18 December 2018; Published: 21 December 2018

## Contents

|                                     |   |
|-------------------------------------|---|
| 1. J99 basis set                    | 1 |
| 2. Calculations on atomic species   | 2 |
| 3. Calculations on diatomic species | 3 |
| 4. Fortran routines of the MSA PES  | 6 |
| 4.1. Global PES                     | 6 |
| 4.2. Local PES                      | 6 |
| References                          | 7 |

## 1. J99 basis set and acronyms for Dunning basis sets

The J99 gaussian basis set is given below in the MOLPRO format :

For H:

basis={

s,H,19.79, 2.945, 0.7209, 0.2301, 0.08552, 0.019

p,H,2.7,1.0, 0.31, 0.087

d,H,1.1, 0.19

}

For Li:

basis = {

s,Li,1938.0, 291.5, 66.53, 19.00, 6.305, 2.340, .9599, .4188, .09161, .04140, .01941 ;

C, 1.4, 0.00054, 0.00417, 0.02114, 0.07898 ;

p,Li, 9.745, 2.187, .6004, .1838, .06625, .02707 ;

d,Li, .3913, .09734, .03306;

f,Li, 0.0066;

}

## 2. Calculations on atomic species

The electronic energies of atomic species H, Li, and  $\text{Li}^+$  calculated by various basis set are summarized in Table S1. For atomic hydrogen, the J99 basis gives the value of -0.499708 [Hartree] for H. Although this value is higher than the values from VQZ and CV5Z, the present basis set is accurate enough to describe the ground-state energy of H and  $\text{H}^-$ . For the lithium ground state ( $\text{Li}(2s)$ ) and first excited state ( $\text{Li}(2p)$ ), the present basis gives absolute values higher than those obtained with the (A)CVXZ basis whether or not the core-valence correlation is included. The absolute energy differences fall in the 0.1-0.3 mH range when core-valence correlation is neglected (3-4 mH when core-valence correlation is included). Ionization energies (resp.  $\text{Li}(2s) \leftarrow \text{Li}(2p)$  excitation energies) using the J99 basis are in very good agreement with the Dunning basis sets as they deviate at most of about  $60 \text{ cm}^{-1}$  (resp.  $45 \text{ cm}^{-1}$ ) with core-valence effects and  $2 \text{ cm}^{-1}$  (resp.  $36 \text{ cm}^{-1}$ ) without core-valence effects. The core-valence correlation has a clear impact on the accuracy of ionization (resp.  $\text{Li}(2s) \leftarrow \text{Li}(2p)$  excitation energies with respect to experimental values since it increases the theoretical values of about  $350 \text{ cm}^{-1}$  (resp.  $150 \text{ cm}^{-1}$ ). The J99 values are in very good agreement both with the results of Yiannopoulou and Jeung [1] using the full set of J99 and with the experimental values [2] (less than 0.3% deviation on the atomic lithium ionization energy). The difference of the ionization energy value predicted by the present basis and the experimental value is less than  $50 \text{ cm}^{-1}$ . These results justify the use of the present basis set and the MRCI method considering core-valence correlation.

58

**Table S1.** Comparison of energies of atomic H, Li and Li<sup>+</sup> species.

| H                         | Method          | Basis <sup>§</sup> | c.v. <sup>#</sup> | E [a.u.]  |                                           |                                        |
|---------------------------|-----------------|--------------------|-------------------|-----------|-------------------------------------------|----------------------------------------|
| Present                   | MRCI<br>(HF)    | J99                | -                 | -0.499708 |                                           |                                        |
|                           |                 | V5Z                | -                 | -0.499995 |                                           |                                        |
|                           |                 | VQZ                | -                 | -0.499948 |                                           |                                        |
| Li (2s)                   | Method          | Basis              | c.v.              | E [a.u.]  | E-E <sub>Li(2s)</sub> [cm <sup>-1</sup> ] | E <sub>Li+</sub> -E[cm <sup>-1</sup> ] |
| Present                   | MRCI            | J99                | Y                 | -7.472929 | 0                                         | 43440                                  |
|                           |                 | CV5Z               | Y                 | -7.477386 | 0                                         | 43468                                  |
|                           |                 | CVQZ               | Y                 | -7.476682 | 0                                         | 43451                                  |
|                           |                 | ACVTZ              | Y                 | -7.474562 | 0                                         | 43380                                  |
|                           |                 | J99                | N                 | -7.432571 | 0                                         | 43085                                  |
|                           |                 | CV5Z               | N                 | -7.432723 | 0                                         | 43085                                  |
|                           |                 | CVQZ               | N                 | -7.432695 | 0                                         | 43085                                  |
|                           |                 | ACVTZ              | N                 | -7.432682 | 0                                         | 43083                                  |
| Yiannopoulou <sup>a</sup> | MRCI            | J99 <sup>c</sup>   | Y                 | -         | 0                                         | 43441                                  |
| Kelly <sup>b</sup>        | Exp.            | -                  | -                 | -         | 0                                         | 43487                                  |
| Li (2p)                   | Method          | Basis              | c.v.              | E [a.u.]  | E-E <sub>Li(2s)</sub> [cm <sup>-1</sup> ] | E <sub>Li+</sub> -E[cm <sup>-1</sup> ] |
| Present                   | MRCI            | J99                | Y                 | -7.404830 | 14946                                     | 28498                                  |
|                           |                 | CV5Z               | Y                 | -7.409485 | 14902                                     | 28565                                  |
|                           |                 | CVQZ               | Y                 | -7.408750 | 14909                                     | 28542                                  |
|                           |                 | ACVTZ              | Y                 | -7.406574 | 14922                                     | 28458                                  |
|                           |                 | J99                | N                 | -7.364749 | 14885                                     | 28200                                  |
|                           |                 | CV5Z               | N                 | -7.365063 | 14850                                     | 28236                                  |
|                           |                 | CVQZ               | N                 | -7.365027 | 14851                                     | 28234                                  |
|                           |                 | ACVTZ              | N                 | -7.364990 | 14857                                     | 28226                                  |
| Yiannopoulou <sup>a</sup> | MRCI            | J99 <sup>c</sup>   | Y                 | -         | 14916                                     | 28525                                  |
| Kelly <sup>b</sup>        | Exp.            | -                  | -                 | -         | 14904                                     | 28583                                  |
| Li <sup>+</sup> (1s)      | Method          | Basis              | c.v. <sup>%</sup> | E [a.u.]  |                                           |                                        |
| Present                   | MRCI            | J99                | Y                 | -7.275002 |                                           |                                        |
|                           |                 | CV5Z               | Y                 | -7.279332 |                                           |                                        |
|                           |                 | CVQZ               | Y                 | -7.278701 |                                           |                                        |
|                           |                 | ACVTZ              | Y                 | -7.276906 |                                           |                                        |
|                           | HF <sup>d</sup> | J99                | N                 | -7.236262 |                                           |                                        |
|                           |                 | CV5Z               | N                 | -7.236411 |                                           |                                        |
|                           |                 | CVQZ               | N                 | -7.236384 |                                           |                                        |
|                           |                 | ACVTZ              | N                 | -7.236380 |                                           |                                        |

<sup>§</sup> VXZ (resp. AVXZ) basis correspond to cc-pVXZ (resp. aug-cc-pVXZ) basis sets of Dunning [3]

<sup>#</sup> c.v.: core-core and core-valence correlation is included (Y) or not (N); % For Li<sup>+</sup>, only core-core correlation is included (Y). When this is not included, the MRCI value is the HF value.

<sup>a</sup> Ref. [1], <sup>b</sup> Ref. [2], <sup>c</sup> The original J99 basis of Ref. [1] consists of 15s10p6d3f->(11s10p6d3f) for Li and 6s4p2d->(3s4p2d) for H.

59

### 60 3. Calculations on diatomic species

61 The minimum energies of the electronic ground state of Lithium hydride and Lithium dimer are  
 62 calculated at the MRCI level with the ACVTZ, CVQZ, CV5Z and J99 basis sets, and the results are  
 63 compared in Table S2. Similarly to the calculations of atomic electronic energies, the absolute energy  
 64 of the ground state minimum of LiH ( $X^1\Sigma$ ) and Li<sub>2</sub> ( $X^1\Sigma_g^+$ ) predicted with the J99 basis is the highest

among the basis sets whether or not core-valence correlation is included. The equilibrium bond lengths, the dissociation energies, and the vertical ionization energies are also compared with the calculated results in past studies and the experimental data. The equilibrium bond lengths obtained with the CVQZ and CV5Z basis (with no core-valence correlation) agree well with those of the VQZ and V5Z calculations in Song et al. [4], as well as Jasik et al. [5,6] studies. When the core-valence correlation is considered, the calculated equilibrium bond lengths are shorter than those from calculation without core-valence correlation, being closer to the experimental value. The bond lengths calculated with the J99 basis considering core-valence correlation compare well with experimental values (0.06 a.u. difference for LiH and 0.001 a.u. for Li<sub>2</sub>). The dissociation energies of LiH and Li<sub>2</sub> are calculated from the difference between the sum of the energies of the two atoms and the energy of the diatomic molecule at equilibrium. The dissociation energies obtained with the CVQZ and CV5Z basis (with no core-valence correlation) agree well with those of the VQZ and V5Z calculations in Song et al. work [4]. The core-valence correlation slightly lowers the dissociation energies with the J99 basis (by 0.25 kcal.mol<sup>-1</sup> or 87 cm<sup>-1</sup>), while increases them with the ACVTZ, CVQZ and CV5Z basis. The dissociation energies of LiH and Li<sub>2</sub> obtained with the J99 basis considering core-valence correlations agree reasonably well with the experimental data with a difference less than 1 kcal.mol<sup>-1</sup> (or 350 cm<sup>-1</sup>). The vertical ionization energies of LiH and Li<sub>2</sub> are calculated as the difference between the energies of LiH<sup>+</sup> and Li<sub>2</sub><sup>+</sup> at the equilibrium bond lengths of the corresponding neutral species. The ground-state energy of LiH<sup>+</sup> calculated with the ACVTZ, CVQZ, CV5Z and J99 basis considering the core-valence correlation are -7.7720, -7.7733 -7.7740, and -7.7693 a.u., and those of Li<sub>2</sub><sup>+</sup> are -14.7951, -14.7987, -14.8001, and -14.7911 a.u., respectively. The calculations with the J99 basis gives the closest values to the experimental ionization potentials among the four basis sets for both LiH<sup>+</sup> and Li<sub>2</sub><sup>+</sup>. These results indicate the reliability of the present basis set and the MRCI method in predicting properties of LiH and Li<sub>2</sub>.

Table S2: Comparison of equilibrium geometries and dissociation energies of the ground states of the LiH and Li<sub>2</sub> diatomic molecules

| LiH ( $X^1\Sigma^+$ )               | Method        | Basis                           | c.v. | $R_e$<br>[a.u.]     | $E_{\min}$<br>[a.u.] | $D_e$<br>[kcal/mol]     | I.P.<br>[eV]    |
|-------------------------------------|---------------|---------------------------------|------|---------------------|----------------------|-------------------------|-----------------|
| Present                             | MRCI          | J99                             | Y    | 3.0218              | -8.0632              | 56.80                   | 7.9978          |
|                                     | MRCI          | CV5Z                            | Y    | 3.0155              | -8.0694              | 57.70                   | 8.0385          |
|                                     | MRCI          | CVQZ                            | Y    | 3.0180              | -8.0684              | 57.53                   | 8.0293          |
|                                     | MRCI          | ACVTZ                           | Y    | 3.0255              | -8.0652              | 56.99                   | 7.9999          |
|                                     | MRCI          | J99                             | N    | 3.0388              | -8.0232              | 57.05                   | 7.9882          |
|                                     | MRCI          | CV5Z                            | N    | 3.0382              | -8.0245              | 57.55                   | 8.0081          |
|                                     | MRCI          | CVQZ                            | N    | 3.0389              | -8.0242              | 57.42                   | 8.0026          |
|                                     | MRCI          | AVTZ                            | N    | 3.0433              | -8.0232              | 56.87                   | 7.9773          |
| Yuan <sup>a</sup>                   | MRCI-F12      | AVTZ                            | N    | 3.0160              | -                    | 57.99                   | -               |
| Song <sup>b</sup>                   | DMBE/SEC      |                                 | N    | 3.0336              | -                    | 58.11                   | -               |
|                                     | PES           |                                 |      |                     |                      |                         |                 |
|                                     | MRCI          | V5Z                             | N    | 3.0351              | -                    | 57.57                   | -               |
|                                     | (Fitting)     |                                 |      |                     |                      |                         |                 |
| Jasik <sup>c</sup>                  | MRCI          | VQZ                             | N    | 3.0359              | -                    | 57.43                   | -               |
|                                     | (Fitting)     |                                 |      |                     |                      |                         |                 |
|                                     | MRCI          | modified<br>cc-pV5Z+ECP2<br>SDF | N    | 3.003               | -                    | 58.12                   | -               |
| Stwalley <sup>d</sup>               | Exp.          | -                               | -    | 3.0152              | -                    | 57.977±0.001            | -               |
| NIST                                | Exp.          | -                               | -    | -                   | -                    | -                       | 7.9 ± 0.3       |
| Li <sub>2</sub> ( $X^1\Sigma_g^+$ ) | Method        | Basis                           | c.v. | $R_e$<br>[a.u.]     | $E_{\min}$<br>[a.u.] | $D_e$<br>[kcal/mol]     | I.P.<br>[eV]    |
| Present                             | MRCI          | J99                             | Y    | 5.0594              | -14.9836             | 23.65                   | 5.2373          |
|                                     | MRCI          | CV5Z                            | Y    | 5.0543              | -14.9931             | 24.06                   | 5.2524          |
|                                     | MRCI          | CVQZ                            | Y    | 5.0571              | -14.9916             | 24.01                   | 5.2496          |
|                                     | MRCI          | ACVTZ                           | Y    | 5.0652              | -14.9872             | 23.87                   | 5.2274          |
|                                     | MRCI          | J99                             | N    | 5.0954              | -14.9030             | 23.74                   | 5.2017          |
|                                     | MRCI          | CV5Z                            | N    | 5.0994              | -14.9038             | 24.07                   | 5.2124          |
|                                     | MRCI          | CVQZ                            | N    | 5.0994              | -14.9037             | 24.04                   | 5.2112          |
|                                     | MRCI          | AVTZ                            | N    | 5.1035              | -14.9033             | 23.81                   | 5.2035          |
| Yuan <sup>a</sup>                   | MRCI-F12      | AVTZ                            | N    | 5.0531              | -                    | 28.58                   | -               |
| Song <sup>b</sup>                   | DMBE/SEC      | -                               | N    | 5.0877              | -                    | 24.45                   | -               |
|                                     | PES           |                                 |      |                     |                      |                         |                 |
|                                     | MRCI(Fitting) | V5Z                             | N    | 5.1020              | -                    | 24.10                   | -               |
|                                     | MRCI(Fitting) | VQZ                             | N    | 5.1046              | -                    | 24.04                   | -               |
| Jasik <sup>e</sup>                  | MRCI          | modified<br>cc-pV5Z+ECP         | N    | 5.0229              | -                    | 24.63                   | -               |
|                                     |               |                                 |      |                     |                      |                         |                 |
| Verma                               | Experiment    | -                               | -    | 5.0586 <sup>f</sup> | -                    | 24.35±0.01 <sup>g</sup> | -               |
| McGeogh <sup>h</sup>                | Experiment    | -                               | -    | -                   | -                    | -                       | 5.1127 ± 0.0003 |

<sup>a</sup> Ref. [7], <sup>b</sup> Ref. [4], <sup>c</sup> Ref. [5], <sup>d</sup> Ref. [8], <sup>e</sup> Ref. [6], <sup>f</sup> Ref. [9], <sup>g</sup> Ref. [10], <sup>h</sup> Ref. [11]

## 92 4. Fortran routines of the MSA PES

### 93 4.1. Global PES

- 94 • fortran\_files/Global\_PES/pes\_Li2H.f90 : modules to calculate the Li2H potential energy
- 95 • fortran\_files/Global\_PES/coeff.dat : coefficients data file read by pes\_Li2H.f90
- 96 • fortran\_files/Global\_PES/driver\_Li2H.f90 : example main program to run pes\_Li2H.f90
- 97 • fortran\_files/Global\_PES/example.inp : example input file
- 98 • fortran\_files/Global\_PES/example.out : example output file

### 99 4.2. Local PES

100  
101 Same file names but in the fortran\_files/Local\_PES/ directory.

102

## References

1. Yiannopoulou, A.; Jeung, G.-H.; Park, S.J.; Lee, H.S.; Lee, Y.S. Undulations of the potential-energy curves for highly excited electronic states in diatomic molecules related to the atomic orbital undulations. *Phys. Rev. A* **1999**, *59*, 1178–1186.
2. Kelly, R.L. Atomic and ionic spectrum lines below 2000 angstroms; hydrogen through krypton part I (H-Cr). *J. Phys. Chem. Ref. Data* **1987**, *16*, 1–649.
3. Prascher, B.P.; Woon, D.E.; Peterson, K.A.; Dunning, T.H.; Wilson, A.K. Gaussian basis sets for use in correlated molecular calculations. VII. Valence, core-valence, and scalar relativistic basis sets for Li, Be, Na, and Mg. *Theor. Chem. Acc.* **2011**, *128*, 69–82.
4. Song, Y.-Z.; Li, Y.-Q.; Gao, S.-B.; Meng, Q.-T. Accurate ab initio-based DMBE potential energy surface for  $\text{HLi}_2(\text{X}^2\text{A}')$  via scaling of the external correlation. *Eur. Phys. J. D* **2014**, *68*.
5. Jasik, P.; Sienkiewicz, J.E.; Domsta, J.; Henriksen, N.E. Electronic structure and time-dependent description of rotational predissociation of LiH. *Phys. Chem. Chem. Phys.* **2017**, *19*, 19777–19783.
6. Jasik, P.; Sienkiewicz, J.E. Calculation of adiabatic potentials of  $\text{Li}_2$ . *Chem Phys* **2006**, *323*, 563.
7. Yuan Meiling; Li Wentao; Chen Maodu Global  $\text{X}^2\text{A}'$  potential energy surface of  $\text{Li}_2\text{H}$  and quantum dynamics of  $\text{H} + \text{Li}_2(\text{X}^1\Sigma_g^+) \rightarrow \text{Li} + \text{LiH}(\text{X}^1\Sigma^+)$  reaction. *International Journal of Quantum Chemistry* **2017**, *117*, e25380.
8. Stwalley, W.C.; Zemke, W.T. Spectroscopy and Structure of the Lithium Hydride Diatomic Molecules and Ions. *J. Phys. Chem. Ref. Data* **1993**, *22*, 87–112.
9. Verma, K.K.; Koch, M.E.; Stwalley, W.C. New Observations and Mass-Reduced Analyses of the Laser-Excited Fluorescence of the  $\text{B}^1\Pi_u\text{-X}^1\Sigma_g^+$  Bands of the  $^6\text{Li}^7\text{Li}$  Molecule. *J. Mol. Spectrosc.* **1981**, *87*, 548–559.
10. Verma, K.K.; Koch, M.E.; Stwalley, W.C. Observation of Levels near Dissociation in the  $\text{X}^1\Sigma_g^+$  State of  $^7\text{Li}_2$ . *J. Chem. Phys.* **1983**, *78*, 3614–3622.
11. McGeoch, M.W.; Schlier, R.E. Autoionizing Rydberg States of. The  $\text{Li}_2$  Molecule: Molecular Constants for  $\text{Li}_2^+$ . *Chem. Phys. Lett.* **1983**, *99*, 347–352.

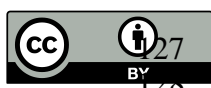

© 2018 by the authors. Submitted for possible open access publication under the terms and conditions of the Creative Commons Attribution (CC BY) license (<http://creativecommons.org/licenses/by/4.0/>).
